# Supplementary material for: New zinc and bismuth doped glass sealants with substantially suppressed boron deposition and poisoning for solid oxide fuel cells
Source: Royal Society of Chemistry journal article supplement (doi:10.1039/c4ta02951h), 2014-01-01
Supplement: c4ta02951h1.pdf [file c4ta02951h1.pdf]

## Supporting information

### New zinc and bismuth doped glass sealants with substantially suppressed boron deposition and poisoning for solid oxide fuel cells

Kongfa Chen,<sup>ab</sup> Lihua Fang,<sup>a</sup> Teng Zhang,<sup>a,\*</sup> San Ping Jiang<sup>b,\*</sup>

<sup>a</sup>College of Materials Science and Engineering, Fuzhou University, Fuzhou, Fujian  
350108, China

<sup>b</sup>Fuels and Energy Technology Institute & Department of Chemical Engineering,  
Curtin University, Perth, WA 6102, Australia

## Experimental

Infrared spectra of glass powders were recorded at room temperature in the range 400-1800  $\text{cm}^{-1}$  using a spectrometer (FT-IR, model NiCOLET5700).

## Results and Discussion

*FT-IR results of the glass samples:*

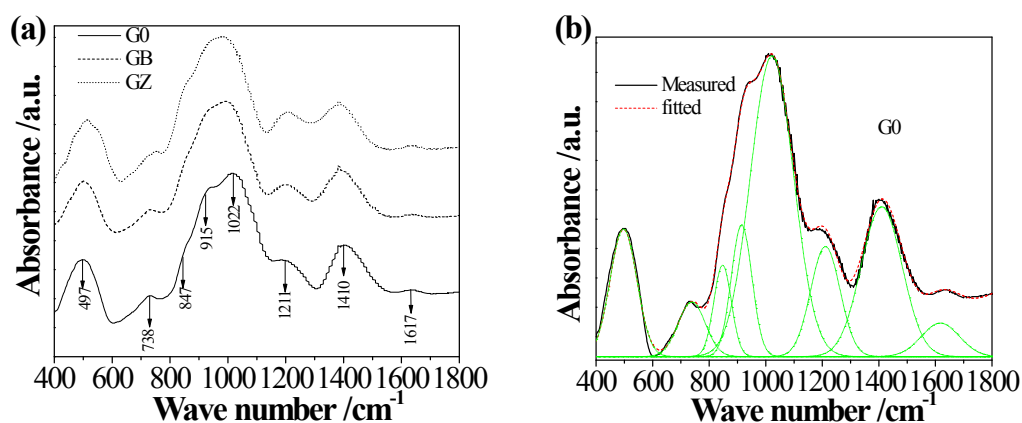

\*Corresponding author. Tel.: +61 8 9266 9804; fax: +61 8 9266 1138; Tel.: +86 591 22866540; fax: +86 591 22866537.

Email address: s.jiang@curtin.edu.au (S.P. Jiang); teng\_zhang@fzu.edu.cn (T. Zhang).

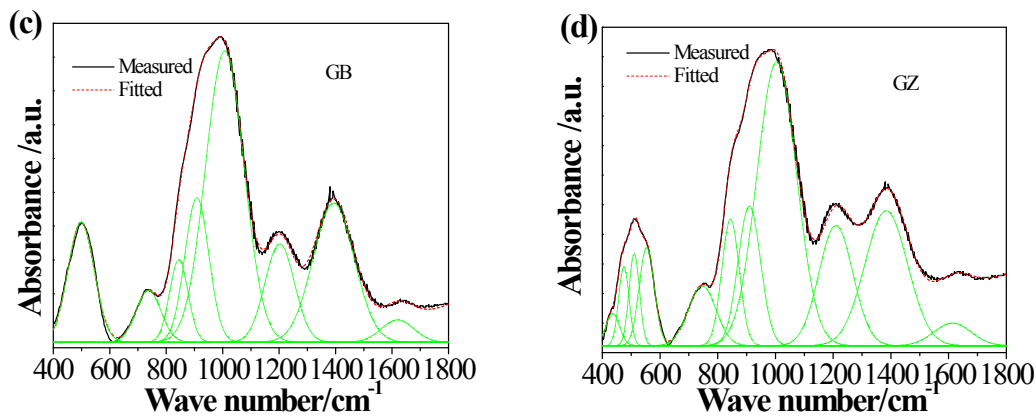

**Figure S1.** (a) FT-IR spectra of quenched glass samples and deconvoluted spectra for (b) G0, (c) GB, and (d) GZ.

**Table S1.** The assignments of vibrational modes in FT-IR spectra.

| Wave number (cm <sup>-1</sup> ) | FT-IR Assignment                                                                                                      |
|---------------------------------|-----------------------------------------------------------------------------------------------------------------------|
| 423~450                         | Overlapped bending modes of Si-O-Si and B-O-B linkages. <sup>1,2</sup>                                                |
| 475~487                         | Si-O-Si, Si-O-B isolated vibrations. <sup>3</sup>                                                                     |
| 440~520                         | Deformation vibrational modes of Si-O-Si links. <sup>4</sup>                                                          |
| 440~470                         | Bridging oxygen bending in the Si network. <sup>5</sup>                                                               |
| 480~488                         | Si-O-Si rocking. <sup>2</sup>                                                                                         |
| 498~508                         | Stretching vibrations of Bi-O bonds in strongly distorted vibrations [BiO <sub>6</sub> ] units. <sup>5-7</sup>        |
| 554                             | Stretching vibrations of [ZnO <sub>4</sub> ] units. <sup>1,8</sup>                                                    |
| 720~780                         | Oxygen bridges between one tetrahedral and one trigonal boron atom. <sup>4</sup>                                      |
| 840                             | Stretching vibrations of the non-bridging oxygens (NBOs) of [BO <sub>4</sub> ] groups. <sup>8</sup>                   |
| 897~909                         | Asymmetric vibration of B-O-Si units. <sup>3</sup>                                                                    |
| 995~1014                        | Stretching vibrations of B-O bonds in [BO <sub>4</sub> ] units from tri-, tetra- and pentaborate groups. <sup>6</sup> |
| 1012~1022                       | Stretching vibrations modes of [SiO <sub>4</sub> ] and [BO <sub>4</sub> ] units. <sup>2</sup>                         |
| 917~1030                        | B-O stretching vibrations of [BO <sub>4</sub> ] tetrahedra. <sup>8</sup>                                              |
| 1200~1300                       | B-O <sup>-</sup> non-bridging stretching in [BO <sub>3</sub> ]. <sup>5,7</sup>                                        |
| 1396~1450                       | Symmetric stretching relaxation of B-O band of triangle [BO <sub>3</sub> ] units. <sup>2,4,9</sup>                    |
| ~1650                           | The [OH] mode of molecular water. <sup>9</sup>                                                                        |

**Table S2.** The assignments of vibrational modes in Raman spectra.

| Wave number (cm <sup>-1</sup> ) | Vibration mode                                                                                                  |
|---------------------------------|-----------------------------------------------------------------------------------------------------------------|
| 208~254                         | Bi-O “breathing” in [BiO <sub>3</sub> ] pyramidal like unit. <sup>10</sup>                                      |
| 250~254                         | Zn-O tetrahedral bending vibrations of [ZnO <sub>4</sub> ] units. <sup>11, 12</sup>                             |
| ~360                            | Rocking motion of silicate units and/or motion of cationic polyhedral. <sup>13</sup>                            |
| 350~375                         | Stretching Bi-O-Bi vibration of the distorted [BiO <sub>6</sub> ] octahedral units. <sup>14, 15</sup>           |
| 467~508                         | Q <sup>3</sup> units and/or mode of B-O-B, B-O-Si, and Si-O-Si linkages. <sup>16</sup>                          |
| 572                             | vibration of [BO <sub>4</sub> ]. <sup>14</sup>                                                                  |
| 620~647                         | Si-O symmetric stretching vibrations in various silicate units (mainly Q <sup>2</sup> units). <sup>13, 16</sup> |
| 677~ 704                        | Q <sup>1</sup> units along with some metaborate units. <sup>16</sup>                                            |
| 700~709                         | B-O-B bending in [BO <sub>3</sub> ]. <sup>5</sup>                                                               |
| ~780                            | [BO <sub>4</sub> ] tetrahedral units with non-bridging oxygen atoms . <sup>6, 13, 16</sup>                      |
| 850~875                         | Q <sup>0</sup> units. <sup>16</sup>                                                                             |
| 850                             | Q <sup>0</sup> group or structural defects Al-O-Si. <sup>17</sup>                                               |
| 890~926                         | Bi-O <sup>-</sup> stretching vibration [BiO <sub>3</sub> ]. <sup>5</sup>                                        |
| 943~1003                        | Q <sup>2</sup> units. <sup>13, 16, 17</sup>                                                                     |
| 950~1000                        | Stretching motion of the Q <sup>2</sup> units. <sup>13, 16, 17</sup>                                            |
| 1050 ~1105                      | Q <sup>3</sup> units. <sup>13, 16</sup>                                                                         |
| 1143~1180                       | Q <sup>4</sup> units . <sup>16</sup>                                                                            |
| 1200 ~1450                      | Vibrations of B-O bond in [BO <sub>3</sub> ] units. <sup>14</sup>                                               |

*XRD results of glass samples heat-treated at 750°C for 2 h:*

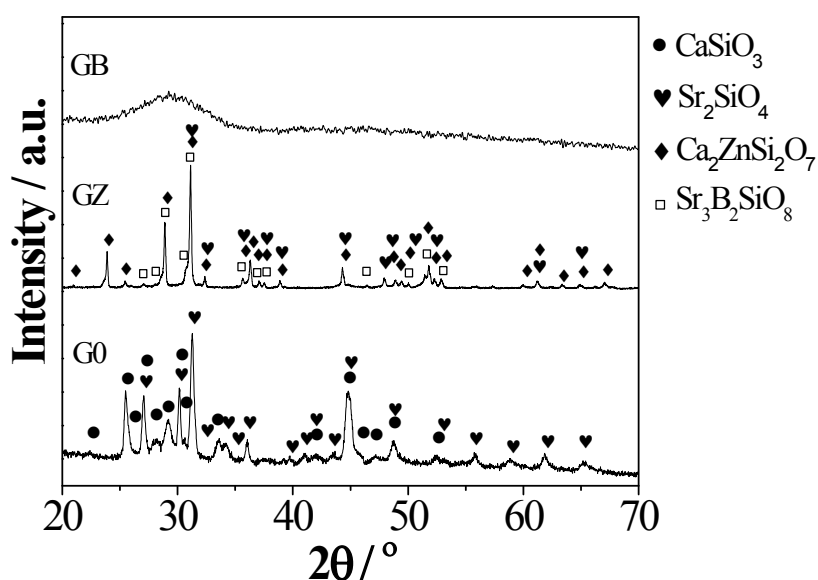**Figure S2.** XRD patterns of glass samples after the heat-treatment at 750°C for 2 h.

Electrochemical performance of a 6- $\mu\text{m}$ -thick LSCF cathode:

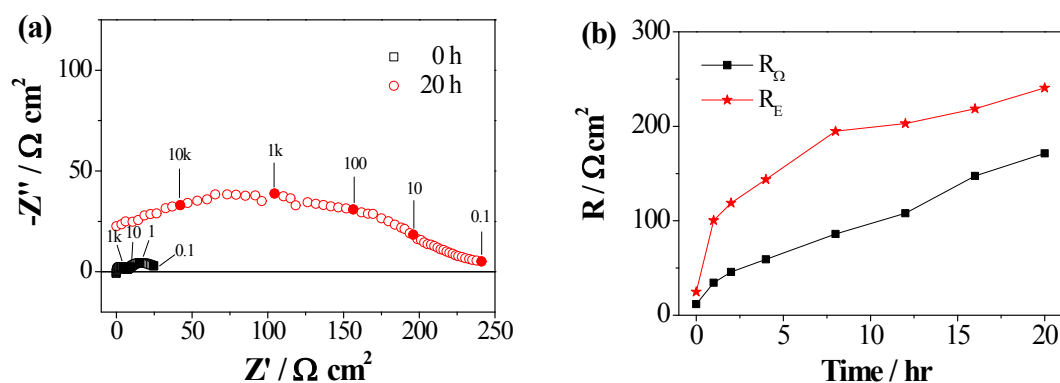

**Figure S3.** (a) Electrochemical impedance curves and (b) plots of  $R_E$  and  $R_\Omega$  for the  $\text{O}_2$  reduction reaction on a LSCF cathode under cathodic current passage at  $200 \text{ mA cm}^{-2}$  and  $700^\circ\text{C}$  for 20 h in the presence of G0 glass. The thickness of the LSCF electrode was  $6 \mu\text{m}$ .

#### References:

1. K. Annapurna, M. Das, P. Kundu, R. Dwivedi and S. Buddhudu, *Journal of Molecular Structure*, 2005, **741**, 53-60.
2. A. Rupesh Kumar, T. Rao, K. Neeraja, M. Rami Reddy and N. Veeraiah, *Vibrational Spectroscopy*, 2013, **69**, 49-56.
3. T. Rao, A. Rupesh Kumar, K. Neeraja, N. Veeraiah and M. Rami Reddy, *Journal of Alloys and Compounds*, 2013, **557**, 209-217.
4. R. Kaur, S. Singh and O. Pandey, *Solid State Communications*, 2014, **188**, 40-44.
5. X. Zhu, C. Mai and M. Li, *Journal of Non-Crystalline Solids*, 2014, **388**, 55-61.
6. R. Vijaya Kumar, P. Gayathri Pavani, B. Ramesh, M. Shareefuddin and K. Siva Kumar, *Optical Materials*, 2013, **35**, 2267-2274.
7. S. C. I. Ardelean, Dorina Rusu, *Physica B: Condensed Matter*, 2008, **403**, 3682-3685.
8. M. Gaafar, N. El-Aal, O. Gerges and G. El-Amir, *Journal of Alloys and Compounds*, 2009, **475**, 535-542.
9. D. Saritha, Y. Markandeya, M. Salagram, M. Vithal, A. Singh and G. Bhikshamaiah, *Journal of Non-Crystalline Solids*, 2008, **354**, 5573-5579.
10. K. Knoblochova, H. Ticha, J. Schwarz and L. Tichy, *Optical Materials*, 2009, **31**, 895-898.
11. S. Bale, N. Rao and S. Rahman, *Solid State Sciences*, 2008, **10**, 326-331.
12. S. Bale, S. Rahman, A. Awasthi and V. Sathe, *Journal of Alloys and Compounds*, 2008, **460**, 699-703.
13. B. Tiwari, A. Dixit and G. Kothiyal, *International Journal of Hydrogen Energy*, 2011, **36**, 15002-15008.
14. H. Fan, G. Gao, G. Wang and L. Hu, *Solid State Sciences*, 2010, **12**, 541-545.
15. T. Inoue, T. Honma, V. Dimitrov and T. Komatsu, *Journal of Solid State Chemistry*, 2010,

**183**, 3078-3085.

16. K. Lu and M. Mahapatra, *Journal of Applied Physics*, 2008, **104**, 074910.
17. N. Dantas, W. Ayta, A. Silva, N. Cano, S. Silva and P. Morais, *Spectrochimica Acta Part A: Molecular and Biomolecular Spectroscopy*, 2011, **81**, 140-143.
